# Supplementary material
Source: PubMed Central journal article supplement (PMC5518636)

**Supplementary table 1. Local and regional disease control by risk group and dose level.**

| Risk group for primary site recurrence | Dose level (Gy) | No. of patients (local recurrence risk) | 5-year LC % | Risk group for neck recurrence | Dose level (Gy) | No. of patients (neck recurrence risk) | 5-year RC % |
|----------------------------------------|-----------------|-----------------------------------------|-------------|--------------------------------|-----------------|----------------------------------------|-------------|
| Lower                                  | ≤54             | 17                                      | 56          | Lower                          | ≤54             | 9                                      | 89          |
|                                        | 57.6            | 65                                      | 87          |                                | 57.6            | 76                                     | 85          |
|                                        | 63              | 57                                      | 81          |                                | 63              | 63                                     | 82          |
| Higher                                 | 63              | 60                                      | 81          | Higher                         | 63              | 60                                     | 74          |
|                                        | 68.4            | 65                                      | 78          |                                | 68.4            | 56                                     | 61          |

**Supplementary figures**

Figure S1A. Overall survival (OS) by ECE status.

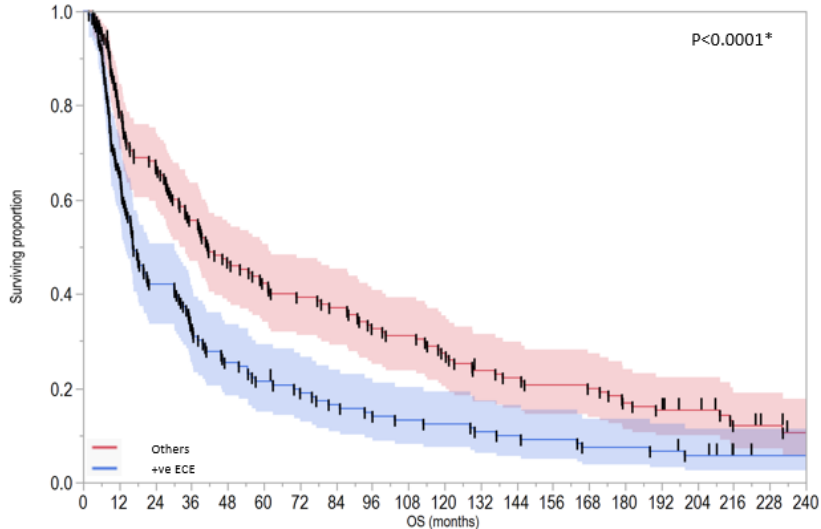

Figure S1B. OS by margin status

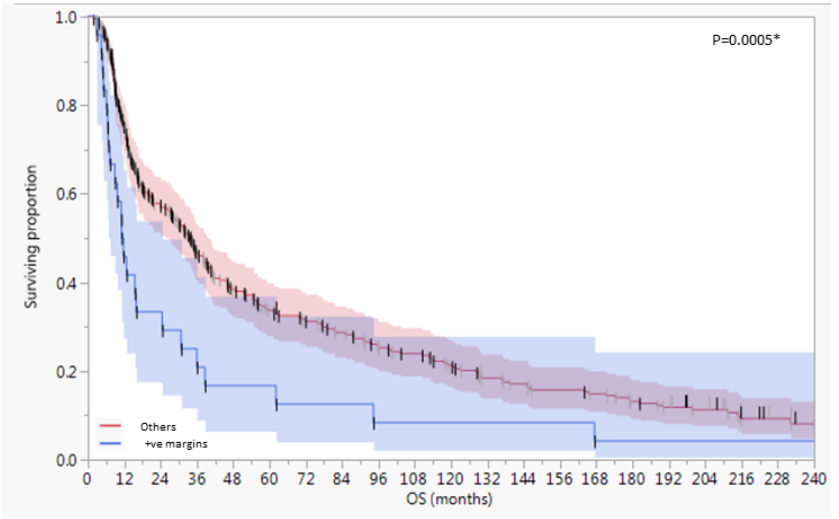

Figure S1C. OS by treatment package time.

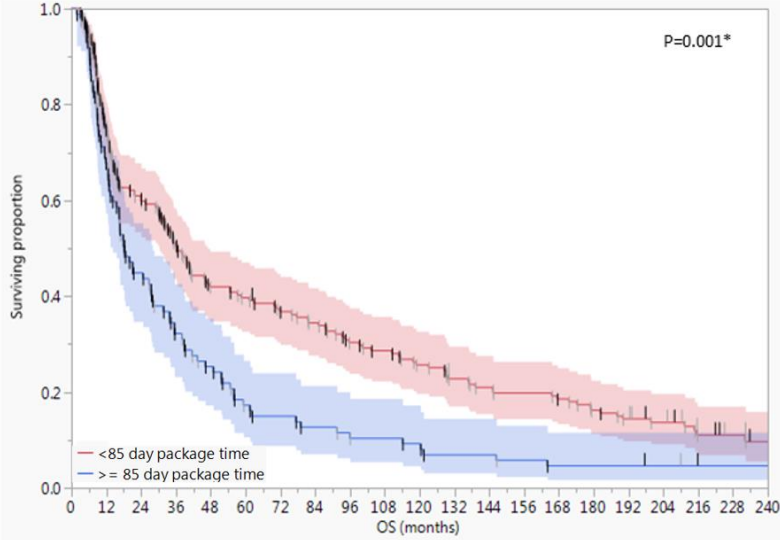

Figure S2. The distribution of treatment package time (TPT) and its components (time from surgery to RT start and RT total time) for each dose group.

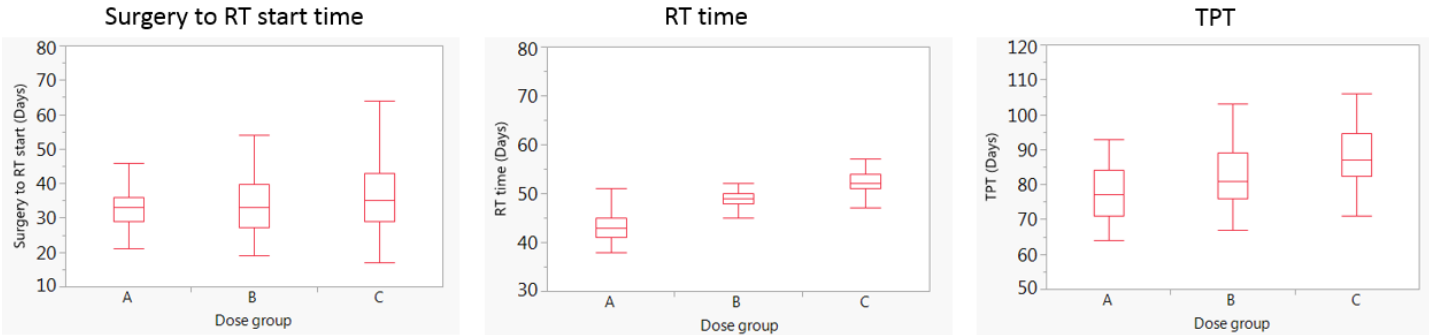

Figure S3. The upper panel shows the locoregional control (LRC) and the lower panel shows the overall survival (OS) by treatment package time (TPT) for different dose levels.

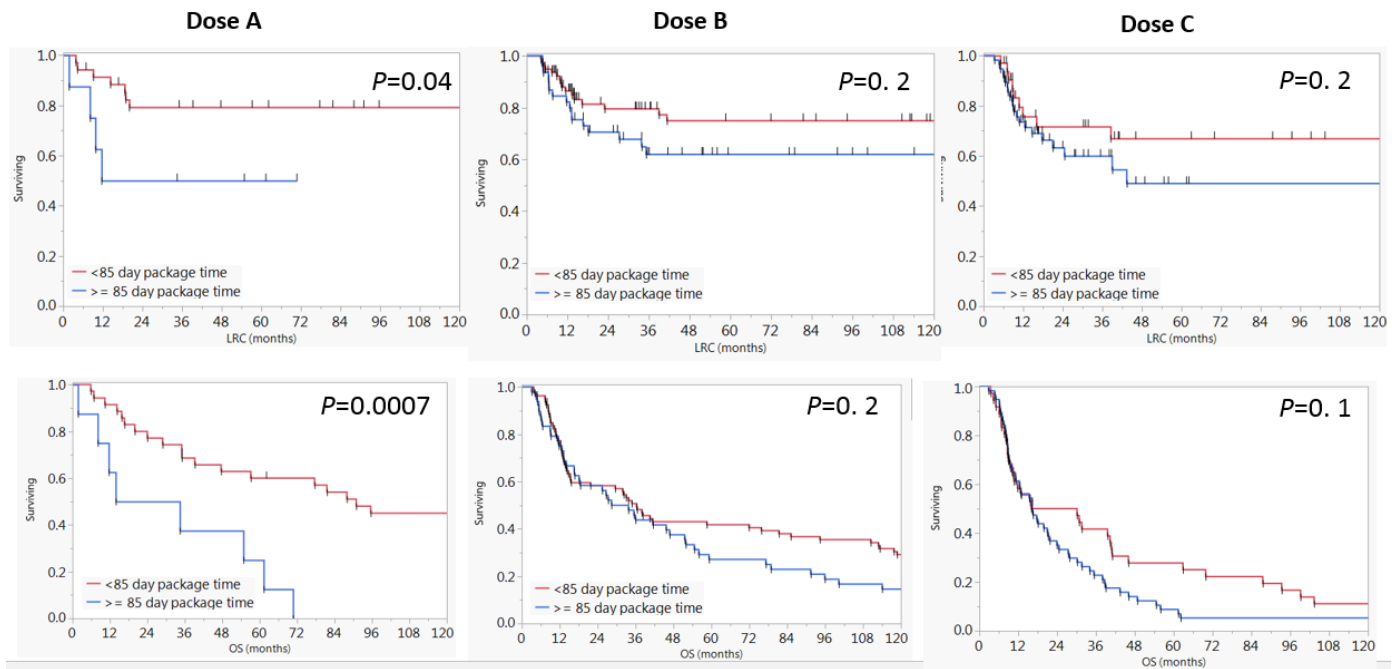

Figure S4. Overall survival (OS) in patients with positive neck dissection by ECE status.

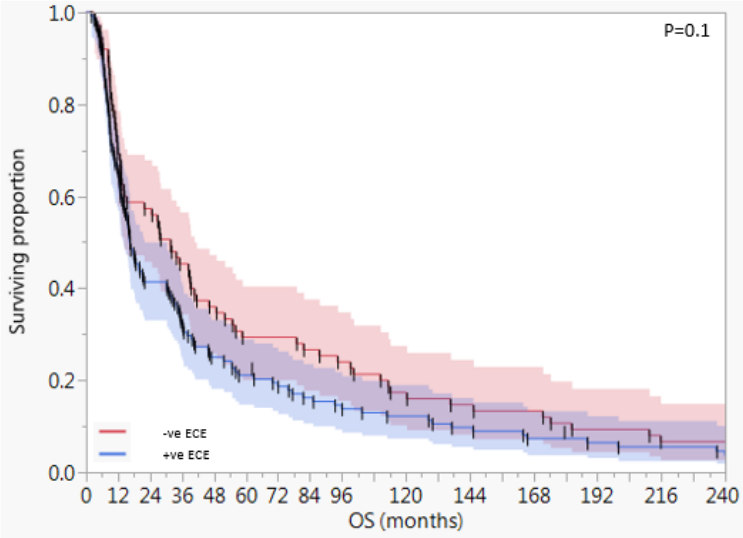

Supplement: NIHMS858132-supplement-1.pdf [file NIHMS858132-supplement-1.pdf]
